# Supplementary material for: Impact of ferrous iron dosing on iron and phosphorus solids speciation and transformation in a pilot scale membrane bioreactor
Source: Royal Society of Chemistry journal article supplement (doi:10.1039/c9ew00225a), 2019-01-01
Supplement: c9ew00225a1.pdf [file c9ew00225a1.pdf]

## **Supplementary Material**

### **Impact of ferrous iron dosing on iron and phosphorus solids speciation and transformation in a pilot scale membrane bioreactor**

Hao Wu<sup>1</sup>, Yuan Wang<sup>1</sup>, Atsushi Ikeda-Ohno<sup>2</sup>, Christopher J. Miller<sup>1</sup> and T.  
David Waite<sup>1,\*</sup>

<sup>1</sup> Water Research Centre, School of Civil & Environmental Engineering, The University of  
New South Wales, Sydney 2052, Australia

<sup>2</sup> Collaborative Laboratories for Advanced Decommissioning Science (CLADS), Japan  
Atomic Energy Agency (JAEA), 2-4 Shirakata, Tokai-mura, Naka-gun, Ibaraki 319-1195,  
Japan

Environmental Science: Water Research & Technology

\*Corresponding author: Professor T. David Waite, Email: [d.waite@unsw.edu.au](mailto:d.waite@unsw.edu.au)

## ***X-ray absorption spectroscopy (XAS)***

### **Data collection**

Iron speciation was studied by X-ray absorption spectroscopy including both X-ray absorption near-edge structure (XANES) and extended X-ray absorption fine structure (EXAFS) regions at the Fe K-edge (7112.0 eV). The X-ray absorption spectra were collected on beamline 17C1 at the National Synchrotron Radiation Research Center (NSRRC), Taiwan (Tsang et al. 1995) using a Si(111) double-crystal monochromator with a Rh-coated mirror. Samples were ground to fine powder, pressed into a pellet of 5 mm diameter and 1.0 to 2.5 mm in thickness, and sealed in plastic bags. For iron reference compounds and some sludge samples with high iron concentrations, a small amount of the sample was mixed with boron nitride to dilute the sample to achieve an appropriate edge jump at the Fe K-edge. The X-ray energy of the acquired spectra was calibrated by the simultaneous measurement of the Fe K-edge for Fe metal foil (defined as 7112.0 eV at the first inflection point). The measurement was performed in transmission mode using He-filled ionization chambers under ambient temperature and pressure. All the collected spectra were processed according to a standard procedure (Koningsberger and Prins 1988) using the programs Athena (Ravel and Newville 2005) and WinXAS (Ressler 1998). The threshold energy,  $E_{k=0}$ , was defined at 7128.5 eV. EXAFS spectra were extracted using the Autobk algorithm ( $R_{\text{bkg}} = 0.9$ ;  $k$ -weight = 3).

For determination of the speciation of P-containing solids, XAS spectra were collected at the P K-edge (2145.5 eV) on beamline 16A1 at NSRRC (Dann et al. 1998) using a Si(111) double-crystal monochromator with a Ni-coated mirror. The dried sample powder was ground and spread homogeneously on Kapton tape immediately before the measurement and transferred into a He-filled sample chamber at the beamline. Reference phosphorous compounds were diluted with boron nitride to obtain optimal fluorescence signals, as well as to minimize self-absorption effects associated with high P loadings. The X-ray energy was calibrated by measuring the  $L_{\text{III}}$ -edge of Nb foil (defined as 2370.5 eV at a first inflection point). The X-ray absorption data was collected in fluorescence mode using an ion chamber filled with He gas (for  $I_0$ ) and a Lytle detector filled with  $\text{N}_2$  gas (for  $I_{\text{F}}$ ) at ambient temperature. The data treatment was undertaken in the same manner employed for the analysis of the Fe K-edge XAS data.

### **Principal component analysis (PCA), target transformation (TT) and linear combination fitting (LCF)**

The Fe K-edge EXAFS spectra were analyzed in a two-step procedure. In the first step, the extracted EXAFS spectra of the sludge samples were analysed by principal component analysis (PCA) (Ressler et al. 2000) using the SIXPACK code (Webb 2005) to determine the number of independent components (i.e. principal components) in a set of the spectra, which corresponds to the maximum number of significant Fe species which enable the reproduction of the series of experimental data. Based on the principal components obtained from the PCA results, target transformation (TT) was further performed in order to find possible reference spectra which can be reasonably reproduced with the principal components of the system (Noël et al. 2014), that is, the reference spectra which, statistically, can be meaningfully used for the subsequent linear combination fitting (LCF) analysis. Based on the results from the PCA/TT,

LCF analysis was performed in the second step using the software Athena (Ravel and Newville 2005) to calculate the fractions (%) of each Fe reference present in the sludge samples.

A range of reference compounds was selected to represent the Fe(II), Fe(III) and P compounds which were potentially present in the sludge. The following compounds were considered in this study: Fe oxyhydroxides (goethite ( $\alpha$ -Fe<sup>III</sup>O(OH)), lepidocrocite ( $\gamma$ -Fe<sup>III</sup>O(OH)), ferrihydrite (Fe<sup>III</sup><sub>2</sub>O<sub>3</sub>·0.5H<sub>2</sub>O), akaganéite ( $\beta$ -Fe<sup>III</sup>O(OH)), hematite ( $\alpha$ -Fe<sup>III</sup><sub>2</sub>O<sub>3</sub>), maghemite ( $\gamma$ -Fe<sup>III</sup><sub>2</sub>O<sub>3</sub>), magnetite (Fe<sup>II,III</sup><sub>3</sub>O<sub>4</sub>), schwertmannite (Fe<sup>III</sup><sub>8</sub>O<sub>8</sub>(OH)<sub>6</sub>SO<sub>4</sub>), Fe phosphate minerals (strengite (Fe<sup>III</sup>PO<sub>4</sub>·2H<sub>2</sub>O), vivianite (Fe<sup>II</sup><sub>3</sub>(PO<sub>4</sub>)<sub>2</sub>·8H<sub>2</sub>O)), Fe sulfide minerals (pyrite (FeS<sub>2</sub>), mackinawite (FeS)) and Fe(III) citrate (C<sub>6</sub>H<sub>5</sub>FeO<sub>7</sub>). The above list of Fe compounds represents the potential Fe products that could be formed during the oxidation and transformation of the dosed iron. Fe(III) phosphate minerals of different composition could occur, however, their EXAFS spectra would be expected to be similar due to the exclusive presence of O shells (i.e. O<sub>PO4</sub> and O<sub>H2O</sub>, both coordinating in a monodentate fashion) in the primary coordination sphere of the Fe centre. In fact, the EXAFS spectrum for strengite (Figure S2 in SI) resembles the reported spectrum for santabarbaraite (Fe<sup>III</sup><sub>3</sub>(PO<sub>4</sub>)<sub>2</sub>(OH)<sub>3</sub>·5H<sub>2</sub>O) (Pratesi et al. 2003). Strengite has also been frequently used as a representative of Fe(III) phosphate minerals in other works (e.g. Voegelin et al. 2010). Therefore, strengite was used as a representative of the possible Fe(III) phosphate minerals present in the sludge in this study. Although the structure of organic matter (OM) is not well defined, it is believed that the major functional groups in OM are carboxyls, phenolic OH, quinones and alcohol OH. Spectroscopic data have confirmed that carboxyl groups are primarily responsible for metal-OM complexation (Boyd et al. 1981, Rose and Waite 2003). Therefore, carboxylic organic acids (OA) can be treated as simplified models for OM. Indeed, comparison of the EXAFS spectrum of Fe(III) citrate with the spectra of other Fe(III)-OM complexes (e.g. iron(III) complexed with fulvic acids (Sjöstedt et al. 2013)) revealed no significant spectroscopic difference. Therefore, Fe(III) citrate is used to represent the iron organic matter (Fe(III)-OM) complexes that may be present in the sludge.

The PCA/TT and LCF analysis was also applied to the P K-edge XANES spectra. The following compounds were considered as possible references: vivianite, strengite (Fe(III)-phosphate), sodium polyphosphate, sodium tripolyphosphate, phytic acid, adenosine triphosphate (ATP), phosphate adsorbed on AFO (P-adsorbed), CaHPO<sub>4</sub>, MgHPO<sub>4</sub> and Na<sub>3</sub>PO<sub>4</sub>.

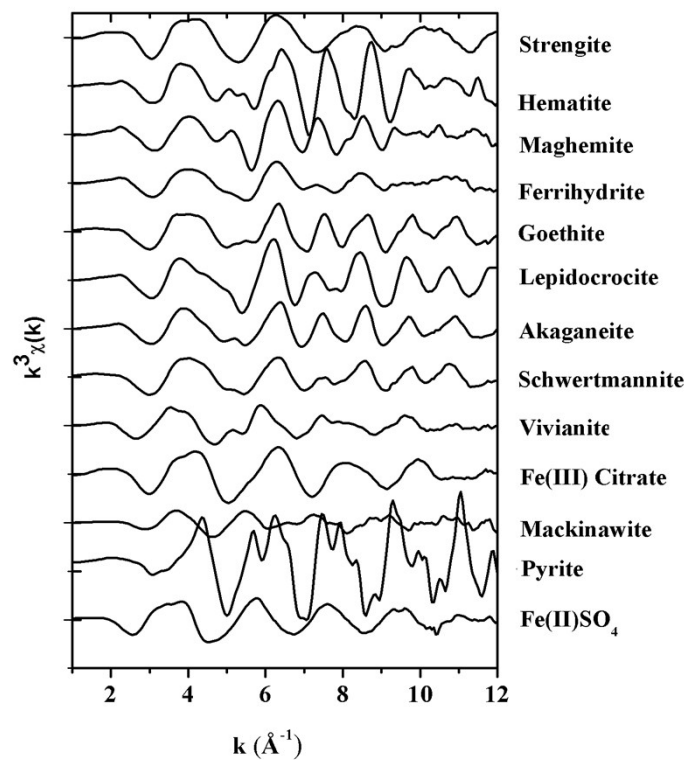

**Figure S1.  $k^3$ -weighted Fe K-edge EXAFS spectra of Fe references.**

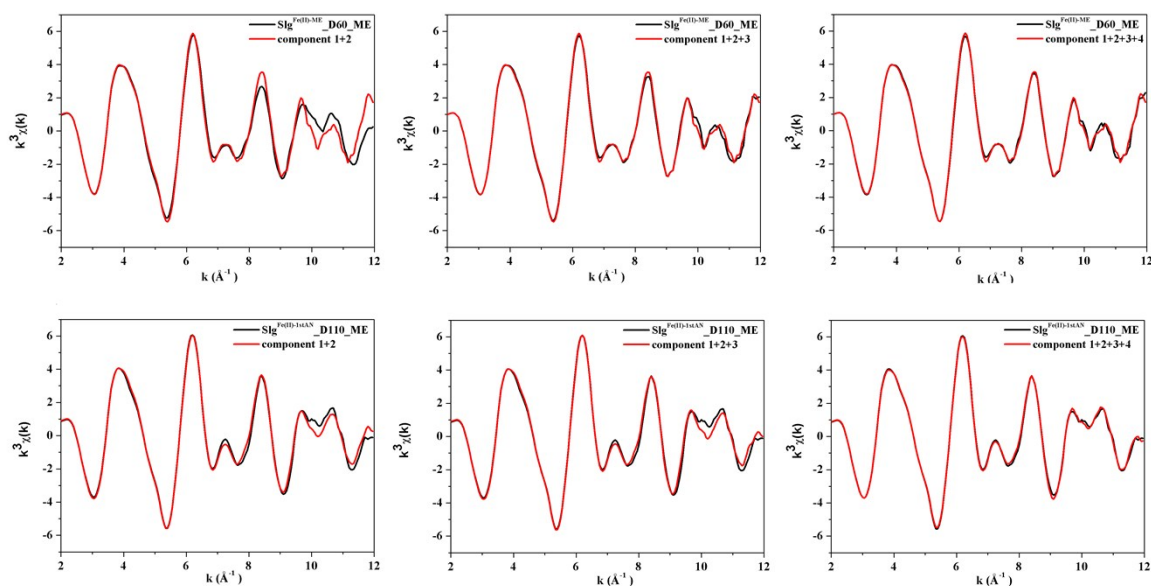

**Figure S2. Reproduction of Fe K-edge EXAFS spectra ( $k^3$ -weighted) for Slg<sup>Fe(II)</sup>-ME\_D60\_ME (top) and Slg<sup>Fe(II)</sup>-1stAN\_D110\_ME (bottom) by principal components 1+2, components 1+2+3, and components 1+2+3+4.**

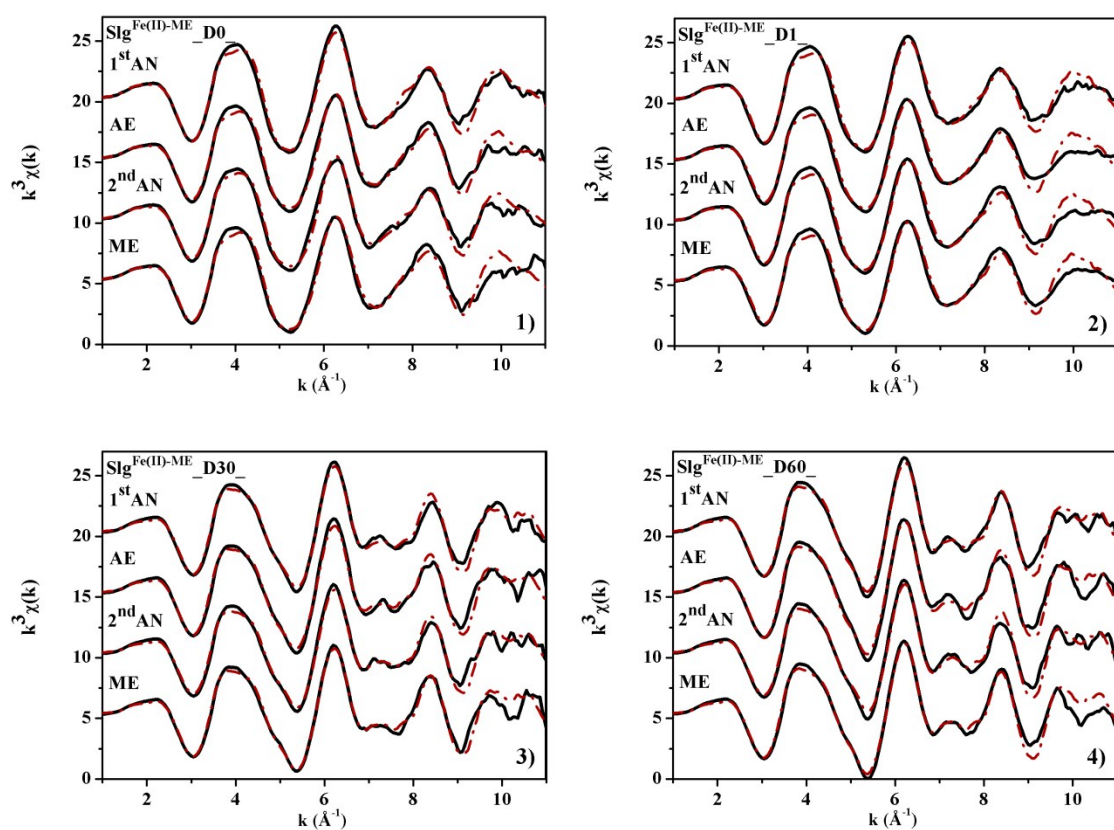

**Figure S3.**  $k^3$ -weighted Fe K-edge EXAFS spectra sludge samples from pilot scale MBRs with membrane chamber as the dosing position, 1) Slg<sup>Fe(II)-ME</sup>\_D0, 2) Slg<sup>Fe(II)-ME</sup>\_D1, 3) Slg<sup>Fe(II)-ME</sup>\_D30, 4) Slg<sup>Fe(II)-ME</sup>\_D60. The black solid lines represent the sample spectra, the red dash dot lines represent the reproduction by LCF.

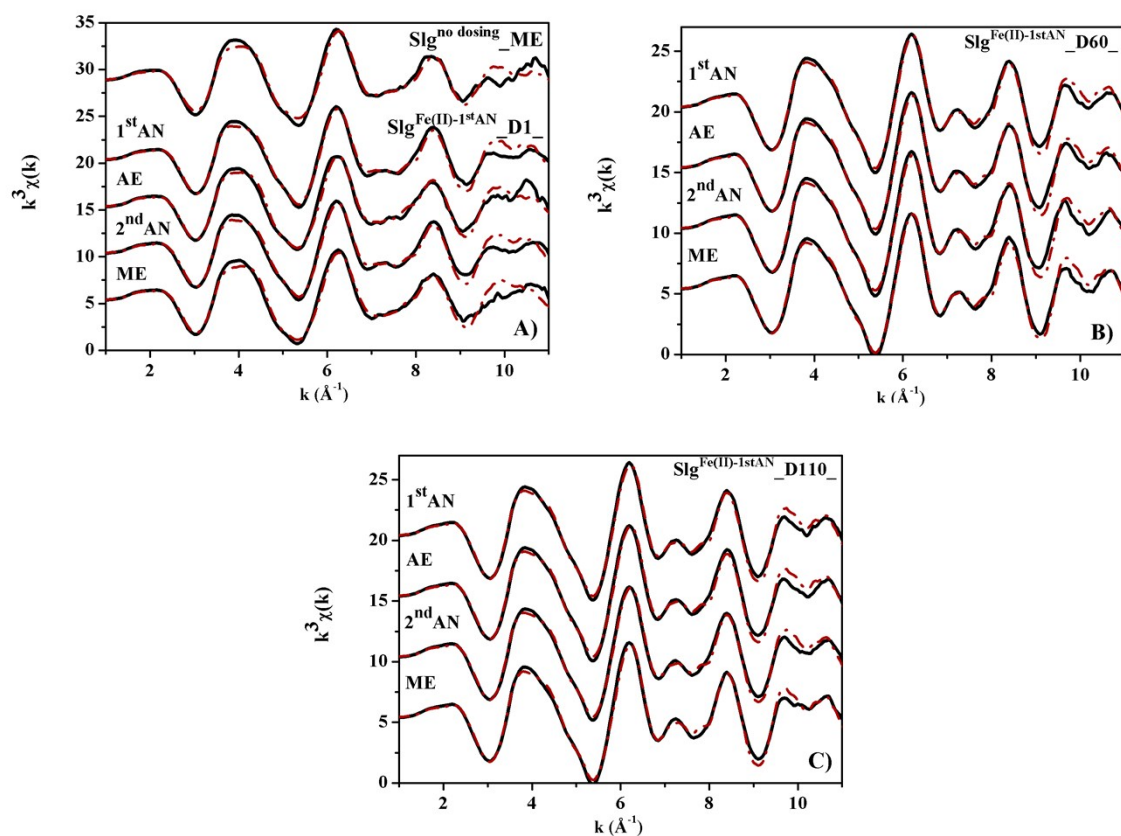

**Figure S4.**  $k^3$ -weighted Fe K-edge EXAFS spectra sludge samples from pilot scale MBRs with 1<sup>st</sup> anoxic chamber as the dosing position, A) Slg<sup>no dosing</sup>\_ME and Slg<sup>Fe(II)-1stAN</sup>\_D1, B) Slg<sup>Fe(II)-1stAN</sup>\_D60, C) Slg<sup>Fe(II)-1stAN</sup>\_D110. The black solid lines represent the sample data while the red dash dot lines represent the reproduction by LCF.

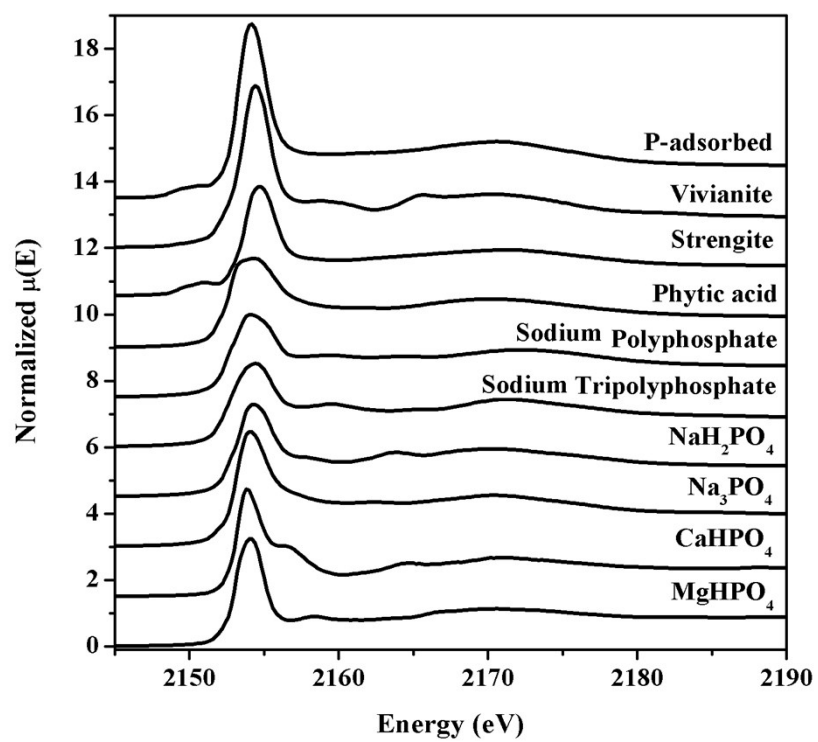

Figure S5. Normalized P K-edge XANES spectra of P references.

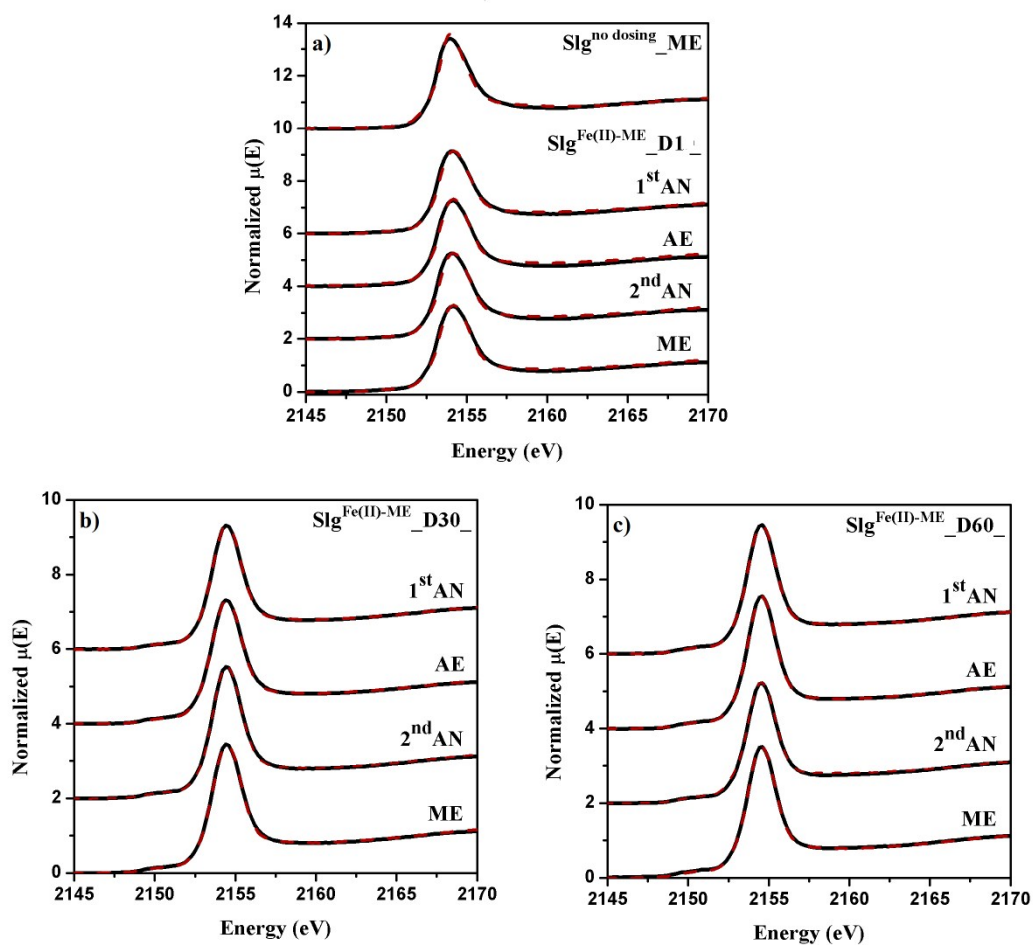

**Figure S6.** Normalized P K-edge XANES spectra of sludge samples from different chambers with membrane chamber as the dosing position: a)  $\text{Slg}^{\text{no dosing\_ME}}$  and  $\text{Slg}^{\text{Fe(II)-ME\_D1}}$ , b)  $\text{Slg}^{\text{Fe(II)-ME\_D30}}$ , c)  $\text{Slg}^{\text{Fe(II)-ME\_D60}}$ . The black line represents the experimental data while the grey dash line represents the reproduction by LCF.



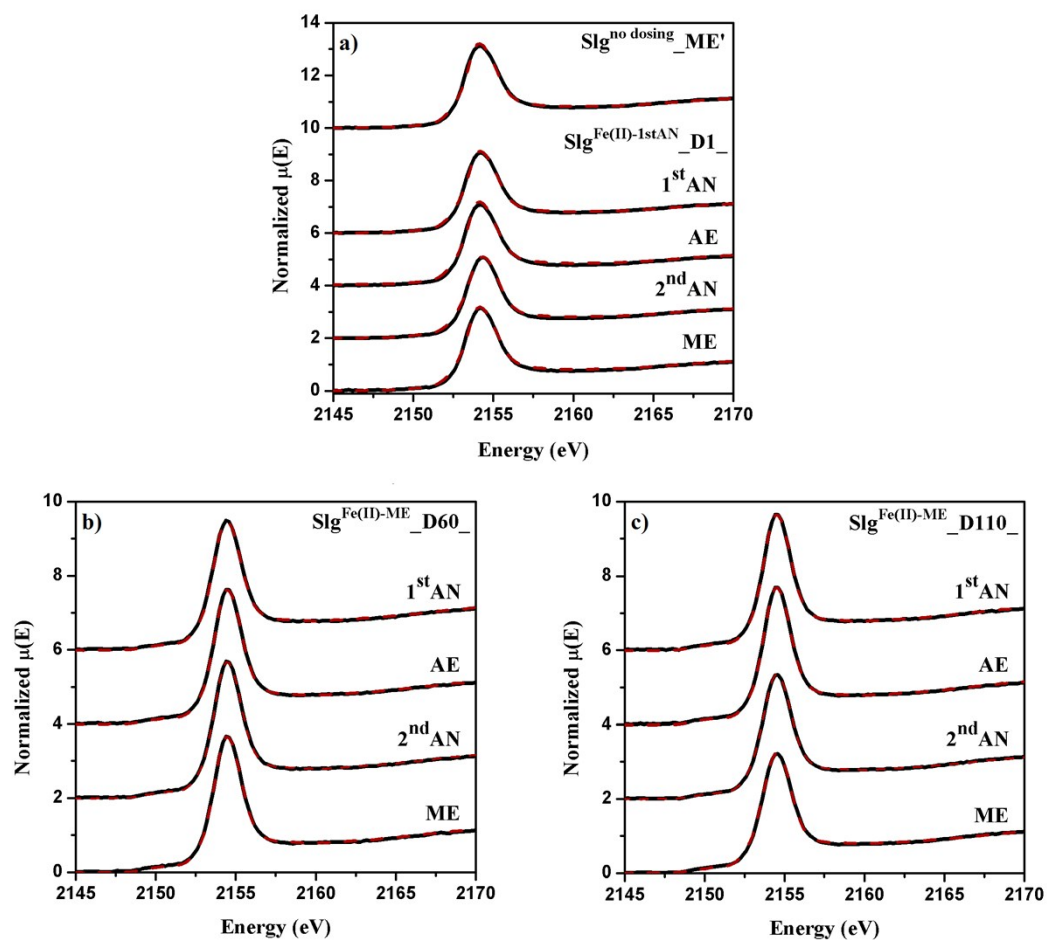

**Figure S7. Normalized P K-edge XANES spectra of sludge samples from different chambers with 1<sup>st</sup> anoxic chamber as the dosing position: a) Slg<sup>no dosing</sup>\_ME' and Slg<sup>Fe(II)-1stAN</sup>\_D1, b) Slg<sup>Fe(II)-1stAN</sup>\_D60, c) Slg<sup>Fe(II)-1stAN</sup>\_D110. The black line represents the experimental data while the grey dash line represents the reproduction by LCF.**

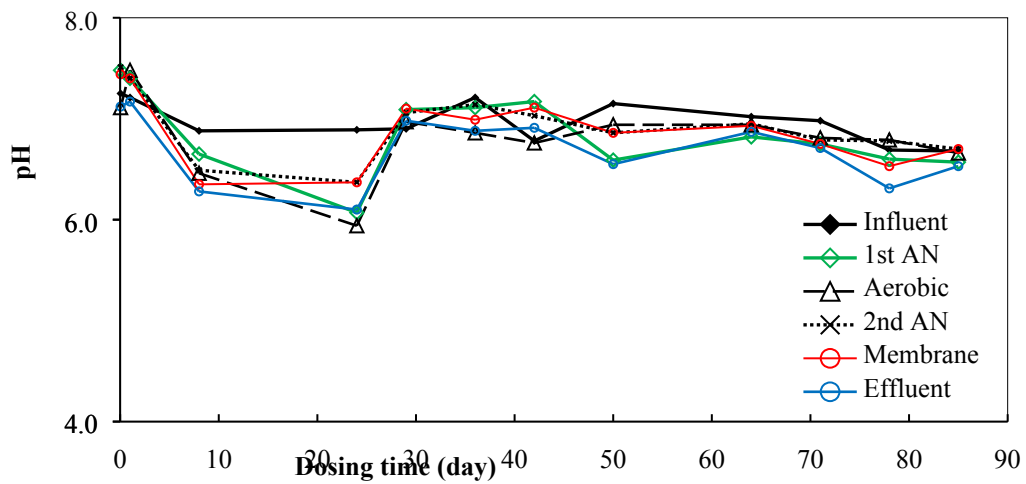

**Figure S8. Changes of pH during Fe(II) dosing to the membrane zone.**

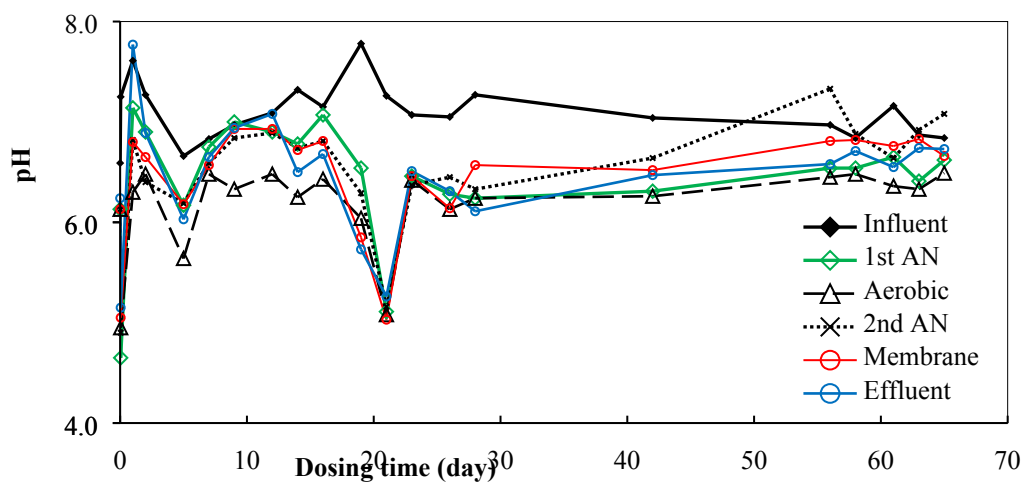

**Figure S9. Changes of pH during Fe(II) dosing to the primary anoxic zone.**

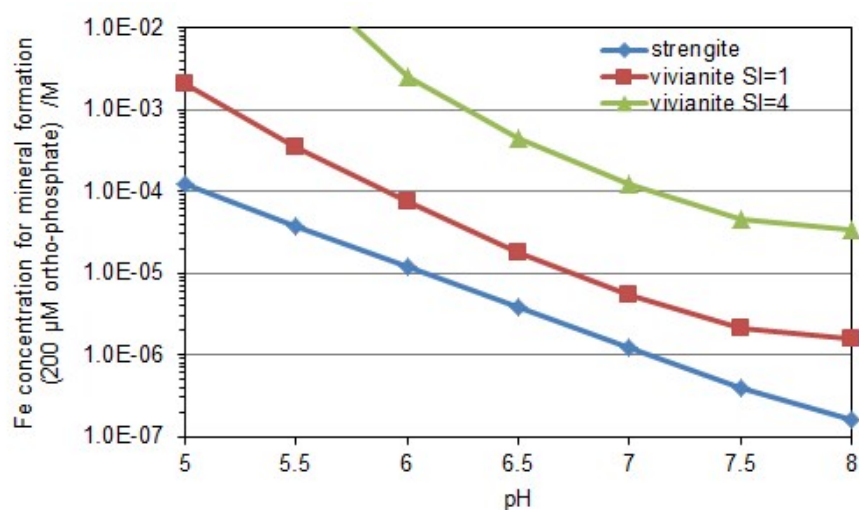

**Figure S10. Fe concentrations required for mineral formation at reactor start up on dosing to the primary anoxic zone.**

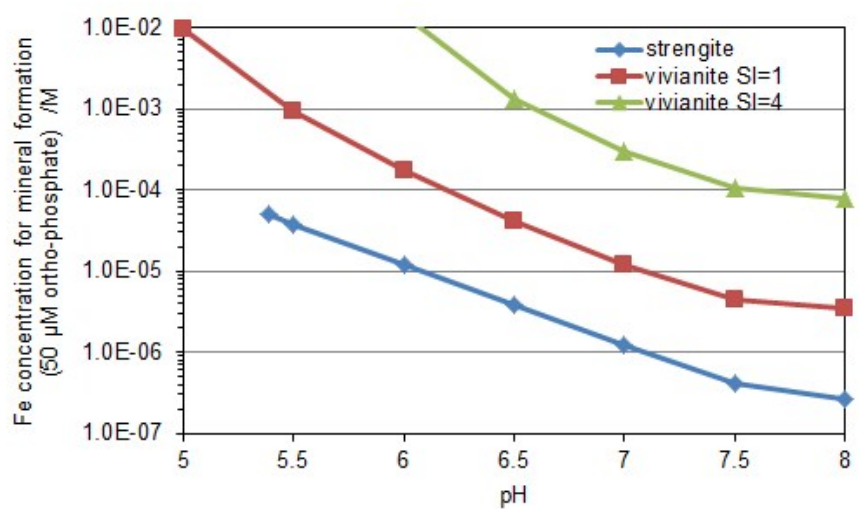

**Figure S11. Fe concentrations required for mineral formation at reactor steady state on dosing to the primary anoxic zone.** Note that data for strengite only shown from pH 5.39 upwards as the presence of dissolved Fe(III)HPO<sub>4</sub> makes strengite precipitation impossible at lower pHs at this low total phosphate concentration).

**Table S1. Design parameters of pilot plant MBR.**

|                                                | <b>Pilot scale MBR</b>                   |
|------------------------------------------------|------------------------------------------|
| Reactor volume                                 | 1.25 m <sup>3</sup>                      |
| Membrane nominal pore size                     | 0.3 µm                                   |
| Total membrane area                            | 10.4 m <sup>2</sup>                      |
| Filtration/Relaxation ratio                    | 7 min : 1 min                            |
| Filtration flux                                | 15.6 L/m <sup>2</sup> h (LMH)            |
| Hydraulic retention time                       | 10 h                                     |
| Sludge retention time                          | 30 days                                  |
| Mixed liquor return flowrate (RAS)             | RAS 1 = 300%; RAS 2 = 400%               |
| DO (in aeration zone)                          | 1.5-2.5 mg/L                             |
| Temperature                                    | 20-25°C                                  |
| COD:N:P                                        | 100:15:2                                 |
| Aeration for bioreactor                        | 0.18 Nm <sup>3</sup> /min                |
| Specific aeration demand for membrane scouring | 0.08 Nm <sup>3</sup> /m <sup>2</sup> min |

**Table S2. Characteristics of MBR influent.**

| <b>Parameter</b>        | <b>Unit</b>             | <b>Mean value<sup>a</sup></b> | <b>Maximum<sup>a</sup></b> | <b>Minimum<sup>a</sup></b> |
|-------------------------|-------------------------|-------------------------------|----------------------------|----------------------------|
| TSS                     | mg/L                    | 112.3                         | 156                        | 72                         |
| TDS                     | mg/L                    | 938.2                         | 1502                       | 602                        |
| Carbonaceous BOD        | mg/L                    | 211                           | 266                        | 108                        |
| COD                     | mg/L                    | 391                           | 449                        | 307                        |
| TOC                     | mg/L                    | 83.2                          | 97.1                       | 71.8                       |
| DOC                     | mg/L                    | 60.9                          |                            |                            |
| Total nitrogen (as N)   | mg/L                    | 53.6                          | 67.0                       | 27.0                       |
| Ammonia-N               | mg/L                    | 33.2                          | 40.9                       | 28.5                       |
| Total phosphorus (as P) | mg/L                    | 8.12                          | 10.46                      | 4.87                       |
| Alkalinity              | mg CaCO <sub>3</sub> /L | 202                           | 231                        | 169                        |
| Ca                      | mg/L                    | 24.5                          | 28.2                       | 20.1                       |
| K                       | mg/L                    | 20.8                          | 26.7                       | 16.6                       |
| Mg                      | mg/L                    | 25.6                          | 44.5                       | 15.5                       |
| Na                      | mg/L                    | 218.4                         | 369.0                      | 132.0                      |
| Al                      | mg/L                    | 0.40                          | 0.61                       | 0.27                       |
| Fe                      | mg/L                    | 1.1                           | 3.5                        | 0.5                        |
| pH                      | -                       | 7.08                          | 7.78                       | 6.16                       |
| Temperature             | °C                      | 23                            |                            |                            |

<sup>a</sup>between April 2012–July 2013

**Table S3. Experimental details of ferrous dosing to the pilot scale MBR.**

|                                        | <b>No dosing</b> | <b>To membrane zone</b> | <b>To primary anoxic zone</b> |
|----------------------------------------|------------------|-------------------------|-------------------------------|
| Period of study                        | 04/2012–10/2012  | 11/2012–02/2013         | 05/2013–08/2013               |
| Average flowrate (m <sup>3</sup> /day) | 3.46             | 3.43                    | 3.74                          |
| MLSS (g/L)                             | 5.3–8.4          | 5.9–13.5                | 5.8–12.9                      |
| MLVSS/MLSS                             | 0.85–0.95        | 0.92–0.67               | 0.86–0.66                     |
| pH                                     | 5.92–7.33        | 5.05–6.82               | 4.95–6.90                     |
| Fe(II):PO <sub>4</sub> molar ratio     | –                |                         |                               |
| Min                                    |                  | 2.01                    | 2.01                          |
| Max                                    |                  | 4.10                    | 3.51                          |
| Average                                |                  | 2.99                    | 2.64                          |

**Table S4. Results of the Principal Component Analysis (PCA) on Fe K-edge EXAFS spectra of the sludges.**

**Group 1**

| Component | Eigenvalue | Variance | Cumulative Variance | IND <sup>a</sup> |
|-----------|------------|----------|---------------------|------------------|
| Comp 1    | 127.936    | 0.625    | 0.625               | 0.03032          |
| Comp 2    | 19.517     | 0.095    | 0.720               | 0.02428          |
| Comp 3    | 9.700      | 0.047    | 0.768               | 0.02451          |
| Comp 4    | 7.895      | 0.038    | 0.806               | 0.02542          |
| Comp 5    | 6.418      | 0.031    | 0.838               | 0.02725          |
| Comp 6    | 5.266      | 0.025    | 0.863               | 0.03032          |
| Comp 7    | 4.768      | 0.023    | 0.887               | 0.03423          |
| Comp 8    | 4.075      | 0.019    | 0.907               | 0.04006          |
| Comp 9    | 3.519      | 0.017    | 0.924               | 0.04890          |
| Comp 10   | 3.445      | 0.016    | 0.941               | 0.06036          |
| Comp 11   | 3.230      | 0.015    | 0.956               | 0.07567          |
| Comp 12   | 2.985      | 0.014    | 0.971               | 0.09366          |
| Comp 13   | 1.943      | 0.009    | 0.981               | 0.14638          |
| Comp 14   | 1.574      | 0.007    | 0.988               | 0.29202          |
| Comp 15   | 1.340      | 0.006    | 0.995               | 0.96550          |
| Comp 16   | 0.965      | 0.004    | 1.0                 | NA               |

**Group 2**

| Component | Eigenvalue | Variance | Cumulative Variance | IND <sup>a</sup> |
|-----------|------------|----------|---------------------|------------------|
| Comp 1    | 119.573    | 0.749    | 0.749               | 0.03531          |
| Comp 2    | 14.940     | 0.093    | 0.743               | 0.02325          |
| Comp 3    | 5.899      | 0.096    | 0.880               | 0.02286          |
| Comp 4    | 4.692      | 0.029    | 0.909               | 0.02264          |
| Comp 5    | 3.551      | 0.022    | 0.931               | 0.02322          |
| Comp 6    | 2.576      | 0.016    | 0.948               | 0.02562          |
| Comp 7    | 1.965      | 0.012    | 0.930               | 0.03036          |
| Comp 8    | 1.534      | 0.009    | 0.970               | 0.03924          |
| Comp 9    | 1.301      | 0.008    | 0.978               | 0.05520          |
| Comp 10   | 1.061      | 0.006    | 0.984               | 0.09057          |
| Comp 11   | 0.987      | 0.006    | 0.991               | 0.17845          |
| Comp 12   | 0.786      | 0.004    | 0.993               | 0.63240          |
| Comp 13   | 0.632      | 0.003    | 1.0                 | NA               |

<sup>a</sup>Indicator function

**Table S5. Target testing of reference spectra using the first four components obtained by PCA in Table S3.**

**Group 1**

| References        | R value | SPOIL <sup>a</sup> |
|-------------------|---------|--------------------|
| Lepidocrocite     | 0.02664 | 1.2595             |
| Fe(III)-phosphate | 0.03681 | 2.3516             |
| Fe(III) Citrate   | 0.04905 | 2.3755             |
| Ferrihydrite      | 0.11178 | 4.1450             |
| Schwertmannite    | 0.10028 | 4.4156             |
| Maghemite         | 0.33260 | 5.8078             |
| Pyrite            | 0.78223 | 6.4522             |
| Hematite          | 0.66772 | 7.0713             |
| Mackinawite       | 0.88135 | 7.1356             |
| Goethite          | 0.35349 | 7.2940             |
| Vivianite         | 0.76533 | 9.4486             |
| Akaganéite        | 0.34520 | 13.0248            |
| Magnetite         | 0.56750 | 14.3142            |

**Group 2**

| References        | R value | SPOIL <sup>a</sup> |
|-------------------|---------|--------------------|
| Lepidocrocite     | 0.04069 | 3.2768             |
| Fe(III)-phosphate | 0.07868 | 3.5119             |
| Ferrihydrite      | 0.10889 | 4.2936             |
| Fe(III) Citrate   | 0.16725 | 4.9382             |
| Goethite          | 0.30425 | 7.0568             |
| Pyrite            | 0.78421 | 7.6277             |
| Maghemite         | 0.40133 | 9.0762             |
| Magnetite         | 0.52867 | 9.6556             |
| Schwertmannite    | 0.18467 | 11.0923            |
| Akaganéite        | 0.32801 | 11.2514            |
| Mackinawite       | 0.88322 | 12.5276            |
| Hematite          | 0.72444 | 15.4574            |
| Vivianite         | 0.7713  | 15.9071            |

<sup>a</sup>SPOIL classification (Malinowski 2002):

0–1.5, excellent; 1.5–3, good; 3–4.5, fair; 4.5–6, acceptable; and >6, unacceptable reference.

**Table S6. Results of the Principal Component Analysis (PCA) on P K-edge XANES spectra of the sludges.**

**Group 1**

| Component | Eigenvalue             | Variance | Cumulative Variance | IND <sup>a</sup>       |
|-----------|------------------------|----------|---------------------|------------------------|
| Comp 1    | 140.689                | 0.890    | 0.890               | 0.00814                |
| Comp 2    | 12.629                 | 0.079    | 0.969               | 0.00157                |
| Comp 3    | 1.874                  | 0.011    | 0.981               | 0.00090                |
| Comp 4    | 0.816                  | 0.005    | 0.986               | 0.00069                |
| Comp 5    | 0.464                  | 0.002    | 0.989               | 0.00061                |
| Comp 6    | 0.402                  | 0.002    | 0.992               | 0.00048                |
| Comp 7    | 0.193                  | 0.001    | 0.993               | 0.00051                |
| Comp 8    | 0.146                  | 0.000    | 0.004               | 0.00055                |
| Comp 9    | 0.123                  | 0.000    | 0.995               | 0.00062                |
| Comp 10   | 0.115                  | 0.000    | 0.995               | 0.00069                |
| Comp 11   | 0.108                  | 0.000    | 0.996               | 0.00078                |
| Comp 12   | 0.091                  | 0.000    | 0.997               | 0.00093                |
| Comp 13   | 0.089                  | 0.000    | 0.997               | 0.00115                |
| Comp 14   | 0.069                  | 0.000    | 0.998               | 0.00149                |
| Comp 15   | 0.068                  | 0.000    | 0.998               | 0.00202                |
| Comp 16   | 0.063                  | 0.000    | 0.998               | 0.00293                |
| Comp 17   | 0.060                  | 0.000    | 0.999               | 0.00461                |
| Comp 18   | 0.052                  | 0.000    | 0.999               | 0.00877                |
| Comp 19   | 0.049                  | 0.000    | 1.0                 | $6.68 \times 10^{-18}$ |
| Comp 20   | $6.68 \times 10^{-18}$ | 0.000    | 1.0                 | NA                     |

**Group 2**

| Component | Eigenvalue | Variance | Cumulative Variance | IND <sup>a</sup> |
|-----------|------------|----------|---------------------|------------------|
| Comp 1    | 59.108     | 0.910    | 0.910               | 0.00846          |
| Comp 2    | 4.136      | 0.063    | 0.974               | 0.00208          |
| Comp 3    | 0.787      | 0.012    | 0.986               | 0.00090          |
| Comp 4    | 0.150      | 0.002    | 0.989               | 0.00100          |
| Comp 5    | 0.144      | 0.002    | 0.990               | 0.00119          |
| Comp 6    | 0.101      | 0.001    | 0.992               | 0.00147          |
| Comp 7    | 0.090      | 0.001    | 0.993               | 0.00191          |
| Comp 8    | 0.087      | 0.001    | 0.995               | 0.00257          |
| Comp 9    | 0.080      | 0.001    | 0.996               | 0.00374          |
| Comp 10   | 0.079      | 0.001    | 0.997               | 0.00577          |
| Comp 11   | 0.064      | 0.000    | 0.998               | 0.01105          |
| Comp 12   | 0.050      | 0.000    | 0.999               | 0.03748          |
| Comp 13   | 0.037      | 0.000    | 1.0                 | NA               |

<sup>a</sup>Indicator function



**Table S7. Target testing of reference spectra using the first four components obtained by PCA in Table S5).**

**Group 1**

| Reference                       | R value | SPOIL <sup>a</sup> |
|---------------------------------|---------|--------------------|
| Na <sub>3</sub> PO <sub>4</sub> | 0.00464 | 1.3666             |
| ATP                             | 0.00124 | 1.5705             |
| Sodium polyphosphate            | 0.00802 | 1.9685             |
| Sodium tripolyphosphate         | 0.01412 | 2.5898             |
| Fe(III)-phosphate               | 0.00057 | 2.7181             |
| Phytic acid                     | 0.01709 | 3.2135             |
| P-adsorbed                      | 0.00508 | 3.3067             |
| Vivianite                       | 0.00395 | 6.5483             |
| MgHPO <sub>4</sub>              | 0.00375 | 7.1686             |
| CaHPO <sub>4</sub>              | 0.01488 | 8.1627             |

**Group 2**

| Reference                       | R value | SPOIL <sup>a</sup> |
|---------------------------------|---------|--------------------|
| Fe(III)-phosphate               | 0.00218 | 1.7445             |
| Sodium polyphosphate            | 0.01055 | 4.4662             |
| ATP                             | 0.00173 | 4.5061             |
| Phytic acid                     | 0.01334 | 4.5719             |
| Na <sub>3</sub> PO <sub>4</sub> | 0.00905 | 4.6014             |
| P-adsorbed                      | 0.00905 | 4.6014             |
| Sodium tripolyphosphate         | 0.01757 | 5.2831             |
| Vivianite                       | 0.0034  | 8.0803             |
| CaHPO <sub>4</sub>              | 0.01769 | 24.2125            |
| MgHPO <sub>4</sub>              | 0.00485 | 41.7923            |

<sup>a</sup>SPOIL classification (Malinowski 2002):

0–1.5, excellent; 1.5– 3, good; 3–4.5, fair; 4.5–6, acceptable; and >6, unacceptable reference.

**Table S8. Concentration of ortho-P in the supernatant in different chambers when Fe(II) dosed to the 1<sup>st</sup> anoxic chamber.**

| Dosing period                         | Concentration of ortho-P (μM) |                        |         |                        |            |
|---------------------------------------|-------------------------------|------------------------|---------|------------------------|------------|
|                                       | influent                      | 1 <sup>st</sup> anoxic | Aerobic | 2 <sup>nd</sup> anoxic | Membrane   |
| Before dosing                         |                               | 173.0                  | 176     | 207                    | 185.0      |
| 1 day                                 |                               | 62.7                   | 13      | 22                     | 14.0       |
| Within 1 SRT                          | 192 ± 36                      | 10.1 ± 0.6             | 15 ± 6  | 21 ± 13                | 12.6 ± 0.2 |
| Steady state<br>(i.e. after 3<br>SRT) |                               | 3.2 ± 0.9              | 3 ± 1   | 3 ± 2                  | 2 ± 1      |

**Table S9. Ferrous and ferric iron concentrations in the supernatant from different chambers of the pilot plant MBR when Fe(II) dosed to the 1<sup>st</sup> anoxic chamber.**

| Dosing period              | Concentration of Fe(II) and Fe(III) (μM) |           |           |           |                        |           |           |           |
|----------------------------|------------------------------------------|-----------|-----------|-----------|------------------------|-----------|-----------|-----------|
|                            | 1 <sup>st</sup> Anoxic                   |           | Aerobic   |           | 2 <sup>nd</sup> Anoxic |           | Membrane  |           |
|                            | Fe(II)                                   | Fe(III)   | Fe(II)    | Fe(III)   | Fe(II)                 | Fe(III)   | Fe(II)    | Fe(III)   |
| 1hr                        | 11.45                                    | 1.40      | 7.59      | 2.01      | 7.43                   | 2.07      | 4.58      | 0.82      |
| 1 day                      | 1.68                                     | 0.97      | 0.76      | 1.77      | 1.24                   | 1.39      | 1.79      | 0.64      |
| Within 1 SRT               | 1.72±0.36                                | 0.78±0.55 | 1.64±0.33 | 0.54±0.16 | 2.08±0.39              | 0.82±0.64 | 1.88±0.57 | 0.73±0.45 |
| Steady-state (after 3 SRT) | 1.73±0.21                                | 0.59±0.80 | 0.86±0.50 | 1.54±0.68 | 1.67±0.14              | 0.89±1.21 | 1.94±0.22 | 1.04±0.66 |

## References

- Boyd, S.A., Sommers, L.E. and Nelson, D.W. (1981) Copper(II) and iron(III) complexation by the carboxylate group of humic acid. *Soil Science Society of America Journal* 45(6), 1241-1242.
- Dann, T.-E., Chung, S.-C., Huang, L.-J., Juang, J.-M., Chen, C.-I. and Tsang, K.-L. (1998) A high-performance double-crystal monochromator soft X-ray beamline. *Journal of Synchrotron Radiation* 5(3), 664-666.
- Koningsberger, D. and Prins, R. (1988) X-ray absorption: principles, applications, techniques of EXAFS, SEXAFS, and XANES.
- Malinowski, E.R. (2002) *Factor Analysis in Chemistry* (3rd Ed). John Wiley and Sons, Inc.
- Noël, V., Marchand, C., Juillot, F., Ona-Nguema, G., Viollier, E., Marakovic, G., Olivi, L., Delbes, L., Gelebart, F. and Morin, G. (2014) EXAFS analysis of iron cycling in mangrove sediments downstream a lateritized ultramafic watershed (Vavouto Bay, New Caledonia). *Geochimica et Cosmochimica Acta* 136(0), 211-228.
- Pratesi, G., Cipriani, C., Giuli, G. and Birch, W.D. (2003) Santabarbaraite: a new amorphous phosphate mineral. *European Journal of Mineralogy* 15(1), 185-192.
- Ravel, B. and Newville, M. (2005) ATHENA, ARTEMIS, HEPHAESTUS: data analysis for X-ray absorption spectroscopy using IFEFFIT. *Journal of Synchrotron Radiation* 12(4), 537-541.
- Ressler, T. (1998) WinXAS: a program for X-ray absorption spectroscopy data analysis under MS-Windows. *Journal of Synchrotron Radiation* 5(2), 118-122.
- Ressler, T., Wong, J., Roos, J. and Smith, I.L. (2000) Quantitative speciation of Mn-bearing particulates emitted from autos burning (methylcyclopentadienyl)manganese tricarbonyl-added gasolines using XANES spectroscopy. *Environmental Science & Technology* 34(6), 950-958.
- Rose, A.L. and Waite, T.D. (2003) Kinetics of iron complexation by dissolved natural organic matter in coastal waters. *Marine Chemistry* 84(1-2), 85-103.
- Sjöstedt, C., Persson, I., Hesterberg, D., Kleja, D.B., Borg, H. and Gustafsson, J.P. (2013) Iron speciation in soft-water lakes and soils as determined by EXAFS spectroscopy and geochemical modelling. *Geochimica et Cosmochimica Acta* 105, 172-186.
- Tsang, K.L., Lee, C.H., Jean, Y.C., Dann, T.E., Chen, J.R., Damico, K.L. and Oversluizen, T. (1995) Wiggler X-ray beamlines at Synchrotron Radiation Research Center. *Review of Scientific Instruments* 66(2), 1812-1814.
- Voegelin, A., Kaegi, R., Frommer, J., Vantelon, D. and Hug, S.J. (2010) Effect of phosphate, silicate, and Ca on Fe(III)-precipitates formed in aerated Fe(II)- and As(III)-containing water studied by X-ray absorption spectroscopy. *Geochimica et Cosmochimica Acta* 74(1), 164-186.

Webb, S.M. (2005) SIXpack: a graphical user interface for XAS analysis using IFEFFIT. *Physica Scripta* 2005(T115), 1011.
